# Supplementary material for: Investigating the Impact of Wildfires on Lake Water Quality Using Earth Observation Satellites
Source: MDPI journal article supplement (doi:10.3390/app14062626), 2024-03-21
Supplement: s1 [file s1]

## Investigating the impact of wildfires on lake water quality using Earth observation satellites

Rossana Caroni, Monica Pinardi, Gary Free, Daniela Stroppiana, Lorenzo Parigi, Giulio Tellina, Mariano Bresciani, Clément Albergel, Claudia Giardino

### Supplementary Materials

#### Tables

**Table S1.** Indicator values for cluster analysis carried out on 2011 burned vegetation types (100% = perfect indicator i.e. Land Cover (LC) burn occurs in only that cluster).

| Cluster    |                       | 1    | 2   | 3    | 4         | 5         | 6         |
|------------|-----------------------|------|-----|------|-----------|-----------|-----------|
| Cluster ID |                       | 1    | 883 | 1059 | 1348      | 1457      | 1648      |
| n          |                       | 1281 | 145 | 152  | 95        | 180       | 171       |
| LC code    | Land cover summary    |      |     |      |           |           |           |
| LC01       | Crop/Herb/shrub       | 0    | 0   | 2    | 0         | <b>46</b> | <b>49</b> |
| LC02       | Cropland              | 0    | 0   | 0    | 0         | <b>21</b> | <b>23</b> |
| LC03       | Crop/Natural          | 0    | 0   | 1    | 0         | <b>22</b> | <b>71</b> |
| LC04       | Crop/Natural          | 0    | 0   | 1    | 0         | 12        | <b>81</b> |
| LC05       | broadleaf, evergreen  | 0    | 0   | 0    | 0         | 1         | <b>52</b> |
| LC06       | broadleaf, deciduous  | 0    | 0   | 0    | 0         | 1         | <b>84</b> |
| LC07       | needleleaf, evergreen | 0    | 2   | 0    | <b>95</b> | 1         | 0         |
| LC08       | needleleaf, deciduous | 3    | 0   | 0    | 4         | 0         | 1         |
| LC09       | mixed leaf trees      | 0    | 0   | 1    | <b>29</b> | 3         | 5         |
| LC10       | tree/shrub            | 0    | 0   | 0    | 3         | 4         | <b>81</b> |
| LC11       | Herbs/trees/shrub     | 1    | 0   | 0    | 0         | 1         | <b>60</b> |
| LC12       | Shrubland             | 0    | 0   | 0    | 2         | 1         | <b>81</b> |
| LC13       | Grassland             | 0    | 0   | 0    | 0         | 6         | <b>79</b> |
| LC14       | Lichen/moss           | 0    | 0   | 0    | <b>28</b> | 0         | 0         |
| LC15       | Sparse veg            | 0    | 0   | 0    | 13        | 1         | <b>22</b> |
| LC16       | Trees flooded         | 0    | 0   | 0    | <b>31</b> | 0         | 12        |
| LC17       | Trees flooded         | 0    | 0   | 0    | 0         | 2         | 16        |
| LC18       | Shrubs/herbs flooded  | 0    | 0   | 0    | 0         | 4         | <b>66</b> |

**Table S2.** List of 106 selected lakes (list and maps at this link: [https://gws-access.jasmin.ac.uk/public/cds\\_c3s\\_lakes/CCI\\_LAKES/CCI\\_LAKE\\_LIST\\_v2/LAKE\\_LIST\\_MASK\\_CCI\\_v2\\_UoR\\_fv\\_1.0.html](https://gws-access.jasmin.ac.uk/public/cds_c3s_lakes/CCI_LAKES/CCI_LAKE_LIST_v2/LAKE_LIST_MASK_CCI_v2_UoR_fv_1.0.html)). AF = Africa, AS = Asia, EU = Europe, NA = North America, OC = Oceania, SA = South America. Lat = latitude; Lon = longitude; Catch area/lake area = ratio catchment area /lake area; 95ile SPI = 95<sup>th</sup> percentile of Standardized Precipitation Index; Cluster on total burned area: III = limited regular annual fires and medium burned area (BA); IV = significant regular annual fires and high BA; V = limited fire peaks and medium BA.

| N. | id           | Name                                   | Countries                                   | Continent | Lat       | Lon        | Lake area (km <sup>2</sup> ) | Catch area / lake area | 95ile SPI | Cluster |
|----|--------------|----------------------------------------|---------------------------------------------|-----------|-----------|------------|------------------------------|------------------------|-----------|---------|
| 1  | GLBL00000013 | Kyoga                                  | Uganda                                      | AF        | 1.58403   | 32.45693   | 2788                         | 114                    | 1.55      | IV      |
| 2  | GLWD00000011 | Great Slave                            | Canada                                      | NA        | 61.99792  | -112.38889 | 26734                        | 37                     | 1.55      | V       |
| 3  | GLWD00000014 | Chad                                   | Chad;Niger;Nigeria                          | AF        | 13.47500  | 14.12500   | 18752                        | 52                     | 1.67      | III     |
| 4  | GLWD00000024 | Volta                                  | Ghana                                       | AF        | 7.48403   | 0.09791    | 6045                         | 67                     | 1.53      | IV      |
| 5  | GLWD00000030 | Albert                                 | The Democratic Republic of the Congo;Uganda | AF        | 1.87709   | 31.13818   | 5527                         | 75                     | 1.60      | IV      |
| 6  | GLWD00000036 | Mweru                                  | The Democratic Republic of the Congo;Zambia | AF        | -9.02430  | 28.70068   | 5043                         | 43                     | 1.66      | IV      |
| 7  | GLWD00000040 | Zaysan                                 | Kazakhstan                                  | AS        | 48.71667  | 83.43193   | 4194                         | 34                     | 1.56      | III     |
| 8  | GLWD00000075 | Hulun                                  | China                                       | AS        | 48.94931  | 117.39929  | 2121                         | 63                     | 1.57      | III     |
| 9  | GLWD00000079 | Kakhovskoye (Kakhovka Reservoir)       | Ukraine                                     | EU        | 47.26459  | 33.95485   | 2092                         | 233                    | 1.50      | III     |
| 10 | GLWD00000087 | Kremenshugskoye (Kremenchuk Reservoir) | Ukraine                                     | EU        | 49.38125  | 32.37776   | 1849                         | 210                    | 1.73      | III     |
| 11 | GLWD00000093 | Krasnoyarskoye (Krasnoyarsk Reservoir) | Russian Federation                          | EU        | 54.85000  | 90.95623   | 1630                         | 179                    | 1.66      | III     |
| 12 | GLWD00000098 | Argyle Reservoir                       | Australia                                   | OC        | -16.36041 | 128.67151  | 829                          | 55                     | 1.69      | IV      |
| 13 | GLWD00000108 | Kossour Reservoir                      | Côte d'Ivoire                               | AF        | 7.32431   | -5.71112   | 500                          | 66                     | 1.67      | IV      |
| 14 | GLWD00000109 | Hungtze                                | China                                       | AS        | 33.32709  | 118.72984  | 1374                         | 120                    | 1.57      | III     |
| 15 | GLWD00000113 | Saratov Reservoir                      | Russian Federation                          | EU        | 52.48820  | 48.16110   | 1073                         | 1201                   | 1.63      | III     |
| 16 | GLWD00000116 | Kainji Reservoir                       | Nigeria                                     | AF        | 10.55903  | 4.54791    | 1035                         | 1518                   | 1.70      | IV      |
| 17 | GLWD00000129 | represa de Ilha Solteira               | Brazil                                      | SA        | -19.79791 | -50.51459  | 1077                         | 346                    | 1.56      | III     |
| 18 | GLWD00000153 | Chapala                                | Mexico                                      | NA        | 20.24445  | -103.10001 | 1052                         | 42                     | 1.71      | III     |
| 19 | GLWD00000190 | Novosibirskoye                         | Russian Federation                          | EU        | 54.30348  | 81.78332   | 1024                         | 223                    | 1.55      | III     |
| 20 | GLWD00000199 | Iepe                                   | Brazil                                      | SA        | -22.82847 | -50.99445  | 407                          | 208                    | 1.53      | III     |
| 21 | GLWD00000217 | Grande                                 | Brazil                                      | SA        | -20.25902 | -48.87431  | 349                          | 339                    | 1.56      | III     |
| 22 | GLWD00000238 | das Brisas                             | Brazil                                      | SA        | -18.30763 | -48.93543  | 333                          | 285                    | 1.51      | III     |
| 23 | GLWD00000249 | Hirakud Reservoir                      | India                                       | AS        | 21.65764  | 83.73401   | 501                          | 145                    | 1.86      | III     |
| 24 | GLWD00000266 | Inhernillo                             | Mexico                                      | NA        | 18.55348  | -101.86737 | 288                          | 381                    | 1.82      | III     |

|    |              |                                     |                                      |    |           |            |     |      |      |     |
|----|--------------|-------------------------------------|--------------------------------------|----|-----------|------------|-----|------|------|-----|
| 25 | GLWD00000274 | Roseires Reservoir                  | Sudan                                | AF | 11.55209  | 34.45624   | 225 | 839  | 1.56 | IV  |
| 26 | GLWD00000279 | Assad                               | Syrian Arab Republic                 | AS | 36.07987  | 38.07013   | 637 | 175  | 1.64 | III |
| 27 | GLWD00000287 | Gaoyou (Kaoyu)                      | China                                | AS | 32.78472  | 119.22083  | 703 | 244  | 1.64 | III |
| 28 | GLWD00000291 | Buir                                | China;Mongolia                       | AS | 47.80625  | 117.70345  | 598 | 36   | 1.70 | III |
| 29 | GLWD00000296 | Chardarinskoye                      | Kazakhstan;Uzbekistan                | AS | 41.13820  | 68.12151   | 745 | 268  | 1.53 | III |
| 30 | GLWD00000306 | Lagdo Reservoir                     | Cameroon                             | AF | 8.88403   | 13.95415   | 623 | 50   | 1.54 | IV  |
| 31 | GLWD00000314 | Upemba                              | The Democratic Republic of the Congo | AF | -8.62291  | 26.38679   | 608 | 118  | 1.62 | IV  |
| 32 | GLWD00000328 | Mingechaurskoye                     | Azerbaijan                           | AS | 40.92153  | 46.75485   | 416 | 148  | 1.54 | III |
| 33 | GLWD00000330 | Sinakharin                          | Thailand                             | AS | 14.72292  | 99.04443   | 346 | 32   | 1.70 | III |
| 34 | GLWD00000337 | Stephens                            | Canada                               | NA | 56.42153  | -95.08681  | 317 | 3129 | 1.89 | V   |
| 35 | GLWD00000347 | Gandhisagar Reservoir               | India                                | AS | 24.44098  | 75.50901   | 524 | 44   | 1.84 | III |
| 36 | GLWD00000386 | Manantali                           | Mali                                 | AF | 13.06598  | -10.37223  | 438 | 64   | 1.57 | IV  |
| 37 | GLWD00000436 | Kyivs'Ke-Reservoir (Kiev Reservoir) | Ukraine                              | EU | 50.91598  | 30.50346   | 636 | 386  | 1.60 | III |
| 38 | GLWD00000460 | Hendrik Verwoerd                    | South Africa                         | AF | -30.62847 | 25.79027   | 294 | 239  | 1.57 | III |
| 39 | GLWD00000462 | Itezhi-Tezhi-Dam                    | Zambia                               | AF | -15.69374 | 25.97846   | 329 | 326  | 1.65 | IV  |
| 40 | GLWD00000471 | Kanivs'Ke                           | Ukraine                              | EU | 50.11736  | 30.89860   | 470 | 729  | 1.57 | III |
| 41 | GLWD00000475 | Tiga                                | Nigeria                              | AF | 11.39098  | 8.43957    | 108 | 61   | 1.72 | III |
| 42 | GLWD00000477 | Malpaso                             | Mexico                               | NA | 17.11598  | -93.48889  | 292 | 118  | 1.70 | III |
| 43 | GLWD00000485 | Lagos                               | Nigeria                              | AF | 6.52987   | 3.54443    | 630 | 76   | 1.68 | III |
| 44 | GLWD00000494 | Agua-Vermelha Reservoir             | Brazil                               | SA | -19.94652 | -49.88265  | 507 | 275  | 1.53 | III |
| 45 | GLWD00000498 | Nagarjuna                           | India                                | AS | 16.22848  | 79.06873   | 196 | 1124 | 1.68 | III |
| 46 | GLWD00000502 | Jebba                               | Nigeria                              | AF | 49.84236  | 136.37359  | 324 | 40   | 1.54 | III |
| 47 | GLWD00000506 | Dniester-Estuary (Dnestrovskiy)     | Republic of Moldova;Ukraine          | EU | 9.44237   | 4.60971    | 275 | 5862 | 1.77 | IV  |
| 48 | GLWD00000509 | Grajau                              | Brazil                               | SA | 46.23125  | 30.34026   | 370 | 197  | 1.58 | III |
| 49 | GLWD00000510 | Tungabhadra                         | India                                | AS | -6.92291  | -44.17501  | 311 | 274  | 1.55 | IV  |
| 50 | GLWD00000528 | Karakaya                            | Turkey                               | AS | 15.17153  | 76.23471   | 353 | 82   | 1.75 | III |
| 51 | GLWD00000542 | Pend-Oreille                        | United States                        | NA | 38.48820  | 38.46318   | 195 | 409  | 1.51 | III |
| 52 | GLWD00000546 | Jupia                               | Brazil                               | SA | 48.13403  | -116.37500 | 360 | 174  | 1.63 | III |
| 53 | GLWD00000553 | Marion                              | United States                        | NA | -20.58402 | -51.52293  | 289 | 1563 | 1.53 | III |
| 54 | GLWD00000556 | Malombe                             | Malawi                               | AF | 33.53125  | -80.45903  | 62  | 604  | 1.69 | III |
| 55 | GLWD00000586 | Malombe                             | Malawi                               | AF | -14.67777 | 35.25068   | 310 | 422  | 1.58 | IV  |
| 56 | GLWD00000601 | Krasnodarskoye Vodokhranilishche    | Russian Federation                   | EU | 44.98959  | 39.25554   | 269 | 167  | 1.54 | III |
| 57 | GLWD00000603 | Ubol Ratana                         | Thailand                             | AS | 16.70209  | 102.59998  | 313 | 39   | 1.56 | III |

|    |               |                            |                                      |    |           |            |     |      |      |     |
|----|---------------|----------------------------|--------------------------------------|----|-----------|------------|-----|------|------|-----|
| 58 | GLWD00000613  | Tshangalele                | The Democratic Republic of the Congo | AF | -10.92430 | 27.04652   | 180 | 70   | 1.84 | IV  |
| 59 | GLWD00000674  | Kisale                     | The Democratic Republic of the Congo | AF | -8.27430  | 26.51249   | 298 | 425  | 1.62 | IV  |
| 60 | GLWD00000746  | Lake Maurepas              | United States                        | NA | 30.26320  | -90.50070  | 237 | 33   | 1.69 | V   |
| 61 | GLWD00000851  | ozero Saltaim-Tenis        | Russian Federation                   | EU | 56.13125  | 71.93679   | 252 | 46   | 1.56 | IV  |
| 62 | GLWD00000937  | Rana Pratap                | India                                | AS | 24.82917  | 75.60068   | 171 | 146  | 1.82 | III |
| 63 | GLWD00000960  | Malye Chany                | Russian Federation                   | EU | 54.56875  | 77.95971   | 204 | 104  | 1.62 | III |
| 64 | GLWD00001007  | Guarico                    | Bolivarian Republic of Venezuela     | SA | 9.03681   | -67.38820  | 188 | 43   | 1.57 | III |
| 65 | GLWD00001046  | Kabamba                    | The Democratic Republic of the Congo | AF | -7.89444  | 27.04027   | 109 | 1442 | 1.53 | IV  |
| 66 | GLWD00001058  | Mamawi                     | Canada                               | NA | 58.61875  | -111.45973 | 146 | 151  | 1.62 | V   |
| 67 | GLWD00001059  | Ukal                       | India                                | AS | 21.34792  | 73.77776   | 370 | 168  | 1.83 | III |
| 68 | GLWD00001076  | Dukan                      | Iraq                                 | AS | 36.10348  | 44.92499   | 120 | 95   | 1.52 | III |
| 69 | GLWD00001286  | Karasor                    | Kazakhstan                           | AS | 49.86875  | 75.55693   | 147 | 54   | 1.62 | III |
| 70 | GLWD00001344  | Oologah                    | United States                        | NA | 36.54792  | -95.60626  | 115 | 97   | 1.57 | III |
| 71 | GLWD00001368  | Kissimmee                  | United States                        | NA | 27.89723  | -81.26598  | 121 | 33   | 1.67 | III |
| 72 | GLWD00001430  | Luoma                      | China                                | AS | 34.11042  | 118.20970  | 248 | 192  | 1.53 | III |
| 73 | GLWD00001501  | Matatila-Dam               | India                                | AS | 25.05348  | 78.32360   | 66  | 311  | 1.96 | III |
| 74 | GLWD00001609  | Uyaly                      | Kazakhstan                           | AS | 46.43264  | 81.28054   | 123 | 167  | 1.59 | III |
| 75 | GLWD00001616  | Poelela                    | Mozambique                           | AF | -24.54235 | 35.05138   | 88  | 165  | 1.62 | III |
| 76 | GLWD00001640  | Davy                       | Canada                               | NA | 58.86736  | -108.29445 | 111 | 78   | 1.56 | III |
| 77 | GLWD00002018  | Yueliang Pao               | China                                | AS | 45.70903  | 123.87081  | 99  | 428  | 1.61 | III |
| 78 | GLWD00002239  | Uryum                      | Russian Federation                   | EU | 54.54792  | 78.49096   | 77  | 148  | 1.61 | III |
| 79 | GLWD00002285  | Ebeyty                     | Russian Federation                   | EU | 54.64659  | 71.73557   | 83  | 94   | 1.55 | III |
| 80 | GLWD00003500  | Maraldy                    | Kazakhstan                           | AS | 52.31598  | 77.77151   | 54  | 33   | 1.71 | III |
| 81 | HYLA00000946  | Promissao                  | Brazil                               | SA | -21.45624 | -49.49793  | 511 | 110  | 1.51 | III |
| 82 | HYLA00001257  | Huoshaohei-Talahong        | China                                | AS | 46.75209  | 124.18540  | 430 | 64   | 1.63 | III |
| 83 | HYLA00001496  | Bargi Dam                  | India                                | AS | 22.79514  | 80.03054   | 153 | 98   | 1.78 | III |
| 84 | HYLA00001503  | Rengali                    | India                                | AS | 21.47292  | 84.95971   | 311 | 82   | 1.77 | III |
| 85 | HYLA00001509  | Sriram Sagar               | India                                | AS | 18.95209  | 78.28610   | 336 | 269  | 1.78 | IV  |
| 86 | HYLA00001612  | Mtera                      | United Republic of Tanzania          | AF | -7.02430  | 35.83749   | 444 | 157  | 1.82 | IV  |
| 87 | HYLA000010381 | Iago Vera                  | Paraguay                             | SA | -26.17291 | -57.47709  | 44  | 40   | 1.59 | III |
| 88 | HYLA000013471 | Ozero Khorosheye           | Russian Federation                   | EU | 53.52848  | 78.55623   | 41  | 194  | 1.57 | III |
| 89 | HYLA000013521 | Surskoye Vodokhranilishche | Russian Federation                   | EU | 53.00209  | 45.33193   | 86  | 160  | 1.58 | III |
| 90 | HYLA000013715 | None                       | Kazakhstan                           | AS | 50.90348  | 74.01318   | 59  | 76   | 1.58 | III |

|     |              |                               |                                      |    |           |           |    |       |      |     |
|-----|--------------|-------------------------------|--------------------------------------|----|-----------|-----------|----|-------|------|-----|
| 91  | HYLA00013995 | Zelenodilske                  | Ukraine                              | EU | 47.53889  | 33.63193  | 15 | 30    | 1.56 | III |
| 92  | HYLA00014041 | Daqing                        | China                                | AS | 46.82431  | 125.13679 | 50 | 37    | 1.66 | III |
| 93  | HYLA00014153 | Nanyin                        | China                                | AS | 45.92014  | 124.45206 | 74 | 404   | 1.62 | III |
| 94  | HYLA00014305 | Oltina                        | Romania                              | EU | 44.16042  | 27.63749  | 20 | 134   | 1.65 | III |
| 95  | HYLA00014360 | Tasytkolskoye Water reservoir | Kazakhstan                           | AS | 43.36042  | 73.96526  | 47 | 567   | 1.54 | III |
| 96  | HYLA00015220 | Al Manzalah                   | Egypt                                | AF | 31.28959  | 32.14513  | 78 | 148   | 1.94 | III |
| 97  | HYLA00015361 | Ramganga reservoir            | India                                | AS | 29.58264  | 78.78262  | 47 | 68    | 1.59 | III |
| 98  | HYLA00015626 | Inle lake                     | Myanmar                              | AS | 20.54167  | 96.91734  | 48 | 57    | 1.74 | III |
| 99  | HYLA00015638 | Isapur                        | India                                | AS | 19.79375  | 77.32360  | 82 | 54    | 1.71 | III |
| 100 | HYLA00015805 | Challawa Gorge                | Nigeria                              | AF | 11.69792  | 8.00693   | 65 | 59    | 1.79 | III |
| 101 | HYLA00015875 | Noung Jur                     | Sudan                                | AF | 7.43264   | 30.58124  | 35 | 14510 | 1.54 | IV  |
| 102 | HYLA00015901 | lac Togo                      | Togo                                 | AF | 6.25417   | 1.41388   | 50 | 132   | 1.57 | IV  |
| 103 | HYLA00016110 | Mweru Wantipa                 | Zambia                               | AF | -8.91180  | 29.77915  | 38 | 39    | 1.77 | IV  |
| 104 | HYLA00016120 | None                          | The Democratic Republic of the Congo | AF | -10.03124 | 27.25415  | 42 | 37    | 1.65 | IV  |
| 105 | HYLA00016223 | Manyame                       | Zimbabwe                             | AF | -17.80485 | 30.53263  | 75 | 53    | 1.64 | IV  |
| 106 | HYLA00016311 | lagoa Bambene                 | Mozambique                           | AF | -24.46458 | 33.26249  | 54 | 69    | 1.57 | III |

**Table S3.** Results of the multinomial logistic regression analysis between category changes (increase, decrease) in chlorophyll-a (Chl-a) or turbidity and geographical factors, land cover, fire extension and rainfall. “All” explanatory group includes altitude, latitude, land cover types (agriculture, forest, grassland, other – sparse vegetation, settlement, wetland), maximum burned area (BA) and total annual rainfall. Results are expressed as p-values.

| Parameter | Change tested | Explanatory group              | Intercept | Altitude | Latitude | Agriculture | Forest | Grassland | Other | Settlement | Wetland | Maximum BA | Total rainfall |
|-----------|---------------|--------------------------------|-----------|----------|----------|-------------|--------|-----------|-------|------------|---------|------------|----------------|
| Chl-a     | Decrease      | All                            | 0.84      | 0.71     | 0.65     | 0.84        | 0.84   | 0.71      | 0.84  | 0.36       | 0.90    | 0.32       | 0.54           |
| Chl-a     | Increase      | All                            | 0.44      | 0.50     | 0.58     | 0.09        | 0.65   | 0.50      | 0.19  | 0.07       | 0.27    | 0.79       | 0.58           |
| Chl-a     | Decrease      | Altitude, Latitude, Land cover | 0.92      | 0.92     | 0.83     | 0.78        | 0.59   | 0.11      | 0.83  | 0.26       | 0.88    |            |                |
| Chl-a     | Increase      | Altitude, Latitude, Land cover | 0.59      | 0.35     | 0.76     | 0.11        | 0.63   | 0.48      | 0.23  | 0.09       | 0.37    |            |                |
| Chl-a     | Decrease      | Altitude, Latitude             | 0.66      | 0.76     | 0.51     |             |        |           |       |            |         |            |                |
| Chl-a     | Increase      | Altitude, Latitude             | 0.27      | 0.27     | 0.49     |             |        |           |       |            |         |            |                |
| Turbidity | Decrease      | All                            | 0.93      | 0.25     | 0.58     | 0.94        | 0.94   | 0.94      | 0.91  | 0.95       | 0.93    | 0.59       | 0.76           |
| Turbidity | Increase      | All                            | 0.85      | 0.11     | 0.40     | 0.82        | 0.84   | 0.32      | 0.28  | 0.08       | 0.65    | 0.50       | 0.96           |
| Turbidity | Decrease      | Altitude, Latitude, Land cover | 0.34      | 0.23     | 0.29     | 0.61        | 0.55   | 0.91      | 0.02  | 0.98       | 0.64    |            |                |
| Turbidity | Increase      | Altitude, Latitude, Land cover | 0.86      | 0.15     | 0.33     | 0.87        | 0.85   | 0.33      | 0.22  | 0.12       | 0.56    |            |                |
| Turbidity | Decrease      | Altitude, Latitude             | 0.85      | 0.20     | 0.81     |             |        |           |       |            |         |            |                |
| Turbidity | Increase      | Altitude, Latitude             | 0.24      | 0.18     | 0.37     |             |        |           |       |            |         |            |                |

## Figures

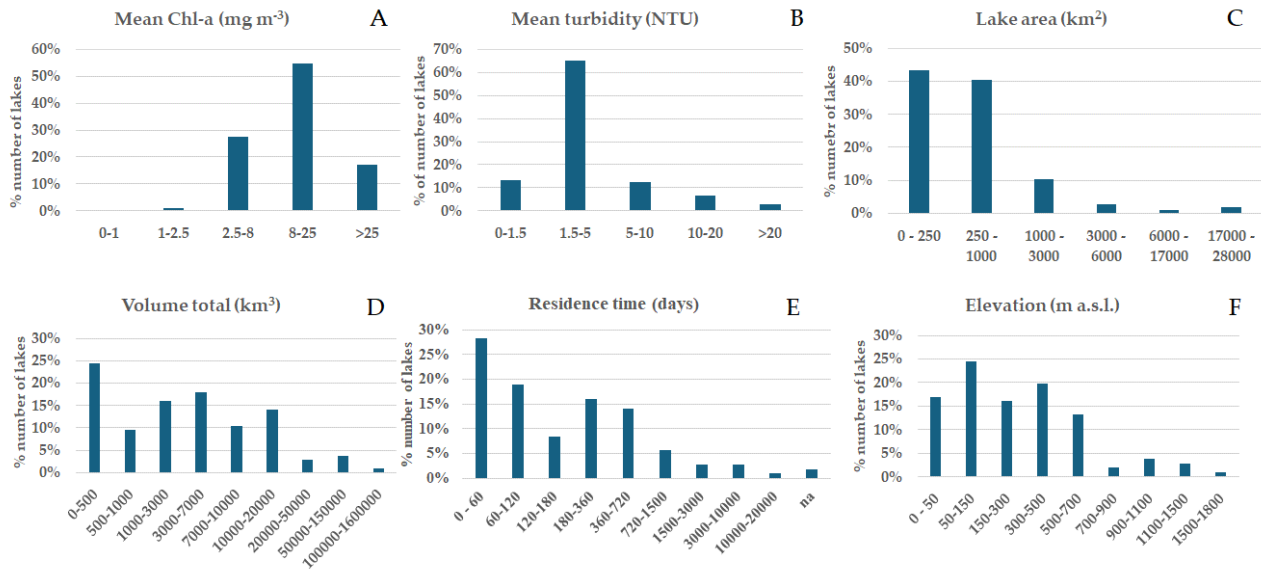

**Figure S1.** Graphs of the percentage of the 106 lakes in each class of the following lake characteristics: mean chlorophyll-a (Chl-a) concentration for the period 2017-2020 (A), mean turbidity concentration for the period 2017-2020 (B), lake area (C), lake total volume (D), residence time (E), elevation (F).

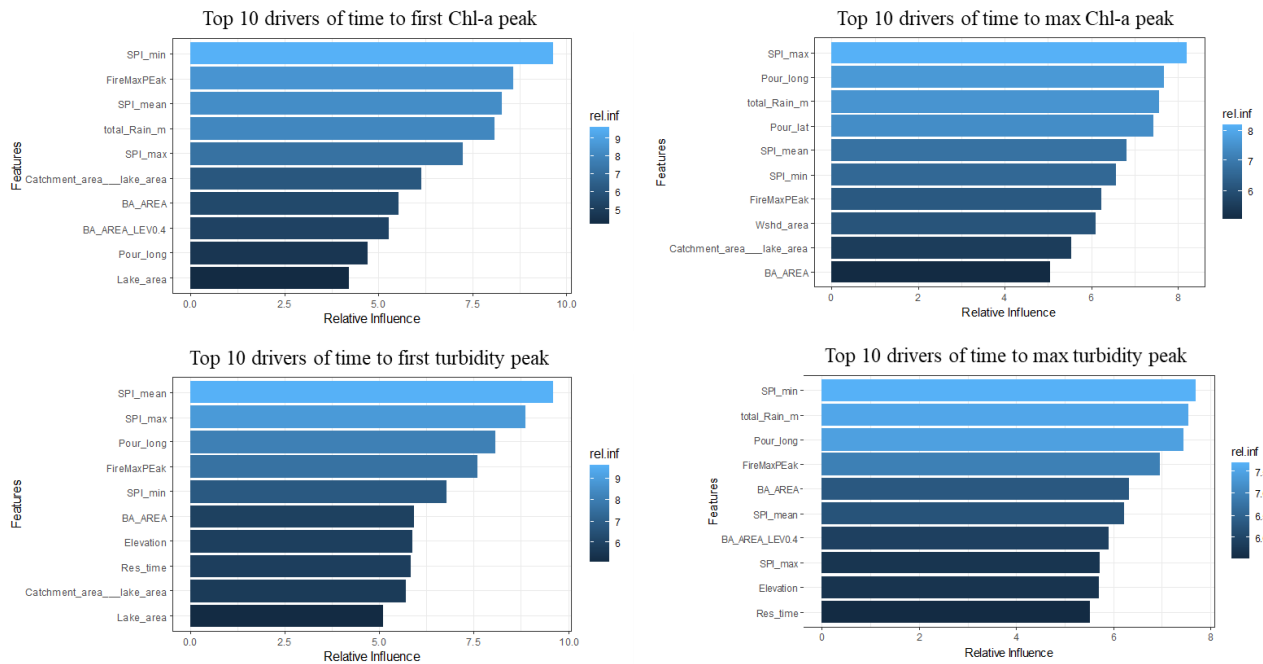

**Figure S2.** Result graphs of the boosted regression analysis to investigate the drivers of timing of first and maximum peaks of chlorophyll-a (Chl-a; upper graphs) and turbidity (lower graphs) after a fire occurrence. Features reported in the graphs are: lake area (Lake\_area), residence time (Res\_time), elevation, watershed area (Wshd\_area), longitude (Pour\_long), latitude (Pour\_lat), ratio catchment area/lake area, ratio burned area(BA)/burnable area (A) level 0-4 (BA\_AREA\_LEV0.4), ratio total BA/A (BA\_AREA), maximum BA (FireMaxPeak), annual SPI mean (SPI\_mean), annual SPI min (SPI\_min), annual SPI maximum (SPI\_max), total annual rainfall (total\_Rain\_m).
